# Supplementary material
Source: PubMed Central journal article supplement (PMC4108550)
Supplement: NIHMS596011-supplement-Supplemental_Material.pdf [file NIHMS596011-supplement-Supplemental_Material.pdf]

## **Supplemental Material**

**Supplemental Table 1.** Associations of circulating FGF-23 concentrations with left atrial diameter (A) and left ventricular end diastolic mass (B) in the Cardiovascular Health Study (CHS)

**A. Left Atrial Diameter**

| FGF-23 (RU/mL) | No. | Mean [cm (SD)] | Adjusted difference (cm with 95% CI) |                      |                      |
|----------------|-----|----------------|--------------------------------------|----------------------|----------------------|
|                |     |                | Model 1                              | Model 2              | Model 3              |
| 0-52.7         | 339 | 3.8 (0.5)      | 0 (ref)                              | 0 (ref)              | 0 (ref)              |
| 52.8-67.9      | 342 | 3.9 (0.6)      | 0.04 (-0.04 to 0.12)                 | 0.02 (-0.06 to 0.10) | 0.02 (-0.06 to 0.10) |
| 68.0-93.7      | 322 | 3.9 (0.5)      | 0.13 (0.05 to 0.21)                  | 0.09 (0 to 0.17)     | 0.08 (0 to 0.17)     |
| 93.8-14,200    | 253 | 3.9 (0.6)      | 0.12 (0.03 to 0.21)                  | 0.04 (-0.06 to 0.14) | 0.05 (-0.05 to 0.15) |
| per doubling   |     |                | 0.08 (0.02 to 0.13)                  | 0.04 (-0.02 to 0.09) | 0.04 (-0.02 to 0.09) |
| p-value        |     |                | 0.004                                | 0.21                 | 0.19                 |

**B. Left Ventricular End Diastolic Mass**

| FGF-23 (RU/mL) | No. | Mean [g (SD)] | Adjusted difference (g with 95% CI) |                       |                       |
|----------------|-----|---------------|-------------------------------------|-----------------------|-----------------------|
|                |     |               | Model 1                             | Model 2               | Model 3               |
| 0-52.7         | 262 | 139 (42)      | 0 (ref)                             | 0 (ref)               | 0 (ref)               |
| 52.8-67.9      | 250 | 137 (40)      | -0.85 (-7.46 to 5.76)               | -3.54 (-9.48 to 2.40) | -3.89 (-9.76 to 1.98) |
| 68.0-93.7      | 238 | 141 (38)      | 5.42 (-1.33 to 12.17)               | 1.58 (-4.81 to 7.97)  | 1.67 (-4.73 to 8.08)  |
| 93.8-14,200    | 200 | 145 (43)      | 11.14 (3.42 to 18.86)               | 5.90 (-1.27 to 13.06) | 6.79 (-0.46 to 14.03) |
| per doubling   |     |               | 7.26 (3.06 to 11.46)                | 4.45 (0.63 to 8.28)   | 5.00 (1.11 to 8.88)   |
| p-value        |     |               | <0.001                              | 0.023                 | 0.012                 |

Results from linear regression models examining associations of plasma FGF-23 with left atrial diameter (A) and left ventricular end diastolic mass (B) in CHS. Cell contents are beta coefficients (in cm (A) and in g (B)) with 95% confidence intervals. Model 1 is adjusted for age, gender, ethnicity, study site, and attained education. Model 2 is additionally adjusted for low-density lipoprotein cholesterol, use of lipid-lowering medications, smoking, diabetes, physical activity, height, height squared, weight, urine albumin-creatinine ratio, estimated glomerular filtration rate, systolic blood pressure, and use of anti-hypertensive medication. Model 3 is adjusted as per Model 2 with the addition of the serum concentrations of calcium, phosphate, 25-hydroxyvitamin D, and parathyroid hormone.

Abbreviations: FGF-23, fibroblast growth factor-23



|          |      |      |     |      |     |     |       |       |  |
|----------|------|------|-----|------|-----|-----|-------|-------|--|
| <5%      |      |      |     |      |     |     |       |       |  |
| N        | 3914 | 140  | 1   | 4055 |     |     |       |       |  |
| AF, N    | 52   | 9    | 0   | 61   | 9   | 0   |       |       |  |
| No AF, N | 3862 | 131  | 1   | 3994 | 132 | 0   | 0.031 | 0.498 |  |
| 5 - 15%  |      |      |     |      |     |     |       |       |  |
| N        | 159  | 1495 | 84  | 1738 |     |     |       |       |  |
| AF, N    | 5    | 116  | 11  | 132  | 11  | 5   |       |       |  |
| No AF, N | 154  | 1379 | 73  | 1606 | 73  | 154 | 0.032 | 0.323 |  |
| >15%     |      |      |     |      |     |     |       |       |  |
| N        | 0    | 88   | 459 | 547  |     |     |       |       |  |
| AF, N    | 0    | 9    | 81  | 90   | 0   | 9   |       |       |  |
| No AF, N | 0    | 79   | 378 | 457  | 0   | 79  | 0.015 | 0.706 |  |
| Total    |      |      |     |      |     |     |       |       |  |
| N        | 4073 | 1723 | 544 | 6340 |     |     |       |       |  |
| AF, N    | 57   | 134  | 92  | 283  | 20  | 14  |       |       |  |
| No AF, N | 4016 | 1589 | 452 | 6057 | 205 | 233 | 0.026 | 0.210 |  |

<sup>1</sup>Model is derived using components from the Framingham AF Risk Score and includes age (continuous), sex, race, body mass index (continuous), systolic blood pressure (continuous), use of hypertension medication, and the PR interval (continuous).

<sup>2</sup>Model further includes FGF-23 (continuous).

\*Sum of the proportions of correctly reclassified subjects with and without AF.

\*\*Significant *P* values indicate change in classification

Abbreviation: FGF-23, fibroblast growth factor-23; AF, atrial fibrillation; NRI, net reclassification improvement

**Supplemental Table 4.** Predictive risks and reclassification for AF using a multivariate risk prediction model with and without inclusion of FGF-23 **in the Cardiovascular Health Study (CHS)**

| 10-Year Risk from Adjusted Model <sup>1</sup> | 10-Year Risk from Model with FGF-23 <sup>2</sup> |       |      |       |                             |                            | Bias corrected NRI* | p-value** |
|-----------------------------------------------|--------------------------------------------------|-------|------|-------|-----------------------------|----------------------------|---------------------|-----------|
|                                               | <5%                                              | 5-15% | >15% | Total | Reclassified to higher risk | Reclassified to lower risk |                     |           |
| <5%                                           |                                                  |       |      |       |                             |                            |                     |           |
| N                                             | 209                                              | 19    | 0    | 228   |                             |                            |                     |           |
| AF, N                                         | 22                                               | 1     | 0    | 23    | 1                           | 0                          |                     |           |
| No AF, N                                      | 187                                              | 18    | 0    | 205   | 18                          | 0                          | -0.055              | 0.374     |
| 5 - 15%                                       |                                                  |       |      |       |                             |                            |                     |           |
| N                                             | 14                                               | 649   | 20   | 683   |                             |                            |                     |           |
| AF, N                                         | 3                                                | 98    | 1    | 102   | 1                           | 3                          |                     |           |
| No AF, N                                      | 11                                               | 551   | 19   | 581   | 19                          | 11                         | -0.036              | 0.160     |
| >15%                                          |                                                  |       |      |       |                             |                            |                     |           |
| N                                             | 0                                                | 24    | 387  | 411   |                             |                            |                     |           |
| AF, N                                         | 0                                                | 6     | 95   | 101   | 0                           | 6                          |                     |           |
| No AF, N                                      | 0                                                | 18    | 292  | 310   | 0                           | 18                         | -0.025              | 0.288     |
| Total                                         |                                                  |       |      |       |                             |                            |                     |           |
| N                                             | 223                                              | 692   | 407  | 1322  |                             |                            |                     |           |
| AF, N                                         | 25                                               | 105   | 96   | 226   | 2                           | 9                          |                     |           |
| No AF, N                                      | 198                                              | 587   | 311  | 1096  | 37                          | 29                         | -0.038              | 0.02      |

<sup>1</sup>Model is derived using components from the Framingham AF Risk Score and includes age (continuous), sex, race, body mass index (continuous), systolic blood pressure (continuous), use of hypertension medication, and the PR interval (continuous).

<sup>2</sup>Model further includes FGF-23 (continuous).

\*Sum of the proportions of correctly reclassified subjects with and without AF.

\*\*Significant *P* values indicate change in classification

Abbreviation: FGF-23, fibroblast growth factor-23; AF, atrial fibrillation; NRI, net reclassification improvement

**Supplemental Table 5.** Mediation analysis: Associations of circulating FGF-23 concentrations with atrial fibrillation controlling for subclinical markers and biomarkers of cardiovascular disease as well as congestive heart failure events in the Multi-Ethnic Study of Atherosclerosis (MESA) and the Cardiovascular Health Study (CHS).

| Covariates | MESA                                        | CHS                                         |
|------------|---------------------------------------------|---------------------------------------------|
| Model 3    | 1.41 (1.13 to 1.76), p = 0.003              | 1.30 (1.05 to 1.61), p = 0.016              |
| LVED Mass  | 1.41 (1.10 to 1.80), p = 0.001              | 1.19 (0.91 to 1.54), p = 0.20*              |
| LVED Size  | 1.40 (1.13 to 1.76), p = 0.003 <sup>§</sup> | 1.19 (0.92 to 1.55), p = 0.18* <sup>¶</sup> |
| LAD        | NA                                          | 1.30 (1.03 to 1.63), p = 0.027              |
| CHF Event  | 1.41 (1.05 to 1.79), p = 0.031              | 1.31 (1.04 to 1.62), p = 0.025              |
| NT pro-BNP | 1.43 (1.11 to 1.92), p = 0.007              | 1.36 (1.10 to 1.70), p = 0.005              |
| CRP        | 1.41 (1.12 to 1.88), p = 0.004              | 1.31 (1.06 to 1.62), p = 0.013              |
| IL-6       | 1.40 (1.12 to 1.91), p = 0.005              | NA                                          |

Cell contents are the hazard ratio (95% confidence interval) describing the association of FGF-23 and incident atrial fibrillation with additional adjustment for each covariate listed in the first column.

Results from Cox proportional hazards regression models for association of circulating FGF-23 with incident atrial fibrillation in MESA and CHS additionally adjusting for subclinical markers and biomarkers of cardiovascular disease as well as congestive heart failure events. These additional markers are added one at a time to Model 3, which is adjusted for age, gender, race/ethnicity, study site, attained education, low density cholesterol, use of lipid-lowering medications, current smoking, diabetes, physical activity, height, height squared, weight, urine albumin-creatinine-ratio, estimated glomerular filtration rate, systolic blood pressure, use of hypertension medication, serum concentrations of calcium, phosphate, 25-hydroxyvitamin D, and parathyroid hormone. Hazard ratios and p-values are derived from the models assessing FGF-23 as a continuous variable.

Abbreviations: FGF-23, fibroblast growth factor-23; LVED, left ventricular end-diastolic; CHF, congestive heart failure; NT pro-BNP, N-terminal pro-B-type natriuretic peptide; IL-6, interleukin 6; CRP, C-reactive protein; LAD, left atrial diameter; NA, not available.

\* Note LVED Mass and LVED Size in CHS represent N=950 with 155 incident atrial fibrillation events.

§ In MESA, left ventricular size was assessed by left ventricular end-diastolic volume.

¶ In CHS, left ventricular size was assessed by left ventricular end-diastolic diameter.

**Supplemental Table 6.** Associations of other circulating mineral metabolites with incident atrial fibrillation in the Multi-Ethnic Study of Atherosclerosis (MESA) and the Cardiovascular Health Study (CHS).

| Mineral Metabolite         | MESA                 | CHS                  |
|----------------------------|----------------------|----------------------|
|                            | Adjusted HR (95% CI) | Adjusted HR (95% CI) |
| Calcium (per mg/dL)        | 0.82 (0.61, 1.11)    | 1.17 (0.80, 1.69)    |
| Phosphorus (per 0.5 mg/dL) | 1.15 (1.02, 1.31)    | 1.02 (0.78, 1.34)    |
| 25OHD (per 10 ng/mL)       | 0.92 (0.81,1.03)     | 1.00 (0.88, 1.14)    |
| PTH (per doubling)         | 0.91 (0.75, 1.09)    | 0.90 (0.70, 1.15)    |

Results from Cox proportional hazards regression models for association of circulating mineral metabolites with incident atrial fibrillation in MESA and CHS. Models are adjusted for age, gender, race/ethnicity, study site, attained education, low density cholesterol, use of lipid-lowering medications, current smoking, diabetes, physical activity, height, height squared, weight, urine albumin-creatinine-ratio, estimated glomerular filtration rate, systolic blood pressure, and use of hypertension medication.

Abbreviations: PTH, parathyroid hormone; 25OHD, 25-hydroxyvitamin D.
